# Supplementary material for: Global Genome Comparative Analysis Reveals Insights of Resistome and Life-Style Adaptation ofPseudomonas putidaStrain T2-2 in Oral Cavity
Source: Hindawi journal article supplement (doi:10.1155/2014/930727), 2014-01-01
Supplement: f1 [file 930727.f1.pdf]

**Supplementary Table 1:** Multidrug resistance efflux pump genes identified in T2-2 genome annotation in RAST and their percentage homology with the closest respective gene

| Multidrug resistance efflux pump genes |                                                                            | Start | End   | Size (nt) | Contig | % homology with closest respective gene in RAST                                          |
|----------------------------------------|----------------------------------------------------------------------------|-------|-------|-----------|--------|------------------------------------------------------------------------------------------|
| RND efflux system                      | Membrane fusion protein CmeA                                               | 7033  | 8175  | 1143      | 5      | <i>P. fluorescens</i> SBW25 (70%)                                                        |
|                                        | Inner membrane transporter CmeB                                            | 8187  | 11312 | 3126      | 5      | <i>Pseudomonas fluorescens</i> SBW25(80%)                                                |
|                                        | Inner membrane transporter CmeB                                            | 6806  | 3654  | 3153      | 195    | <i>Pseudomonas fluorescens</i> SBW25(80%)                                                |
|                                        | Outer membrane lipoprotein CmeC                                            | 3657  | 2203  | 1455      | 195    | <i>Pseudomonas fluorescens</i> SBW25(78%)                                                |
|                                        | Outer membrane lipoprotein CmeC                                            | 28389 | 26965 | 1425      | 42     | <i>Salmonella enterica</i> subsp. <i>enterica</i> serovar Choleraesuis str. SC-B67 (70%) |
|                                        | Outer membrane lipoprotein CmeC                                            | 13706 | 12339 | 1368      | 112    | <i>Ralstonia eutropha</i> JMP134 (43%)                                                   |
|                                        | Type I secretion outer membrane protein, TolC precursor                    | 9874  | 11310 | 1437      | 155    | <i>Pseudomonas fluorescens</i> SBW25(82%)                                                |
|                                        | Type I secretion outer membrane protein, TolC precursor                    | 21693 | 23075 | 1383      | 22     | <i>Azotobacter vinelandii</i> (61%)                                                      |
|                                        | Multidrug and toxin extrusion (MATE) family efflux pump YdhE/NorM, homolog | 1119  | 2507  | 1389      | 210    | <i>Pseudomonas fluorescens</i> SBW25 (75%)                                               |

|                                                                 |       |       |      |     |                                            |
|-----------------------------------------------------------------|-------|-------|------|-----|--------------------------------------------|
| Membrane fusion protein of RND family multidrug efflux pump     | 7964  | 6810  | 1155 | 195 | <i>Pseudomonas fluorescens</i> SBW25 (77%) |
| RND multidrug efflux transporter; Acriflavin resistance protein | 14627 | 11583 | 3045 | 191 | <i>Pseudomonas fluorescens</i> SBW25 (85%) |
| RND multidrug efflux transporter; Acriflavin resistance protein | 31667 | 28491 | 3177 | 42  | <i>Pseudomonas aeruginosa</i> PAO1 (72%)   |
